# Supplementary material
Source: Springer Nature journal article supplement (https://www.springermedizin.de/resource/supplementary/12981_2009_118_MOESM1_ESM.pdf/9603862)

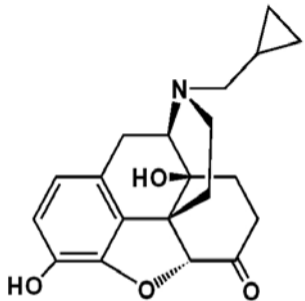

**Naltrexone**

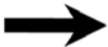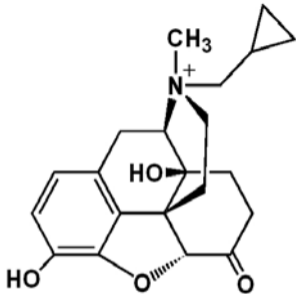

**Methylnaltrexone**

Supplement: MOESM1 [file 9603862]
